# Supplementary material
Source: Elsevier journal article supplement (https://www.sciencedirect.com/science/article/pii/S2444382421000560)
Supplement: mmc1 [file S2444382421000560:mmc1.doc]

Supplementary table 1. Baseline characteristics of patients.: comorbidities and medication

|  | **1-day LRD?**  **(n =67)** | **3-day LRD‡**  **(n =68)** | ***P*** |
| --- | --- | --- | --- |
| Comorbidity — no. (%) |  |  |  |
| Diabetes | 36 (53,7) | 42 (61.8) | 0.35 |
| Stroke | 9 (13.4) | 5 (7.4) | 0.25 |
| Cirrhosis | 1 (1.5) | 4 (5.9) | 0.18 |
| Chronic renal failure | 9 (13.4) | 4 (5.9) | 0.14 |
| Hypertension | 25 (37.3) | 32 (47.1) | 0.25 |
| Constipation | 24 (35.8) | 30 (44.1) | 0.33 |
| Abdominal/pelvic surgery  Colon surgery | 32 (47.8)  5 (7,5) | 34 (50.0)  [  3 (4.4) | 0.80  0.49 |
| Medical treatment— no. (%) |  |  |  |
| Opioids | 5 (7.5) | 7 (10.3) | 0.56 |
| Calcium antagonists | 14 (20.9) | 15 (22.1) | 0.87 |
| Antidepressants | 11 (16.4) | 10 (14.7) | 0.78 |
